# Supplementary material for: Synergistic study of a Danshen (Salvia Miltiorrhizae Radix et Rhizoma) and Sanqi (Notoginseng Radix et Rhizoma) combination on cell survival in EA.hy926 cells
Source: Springer Nature journal article supplement (doi:10.1186/s12906-019-2458-z), 2019-02-21

Additional file 2: Contents (mg/g, mean±SD, n=3) of DSS, SB, NR1, Rg1, and Rb1 in DS-SQ combinations extract by UPLC-PDA.

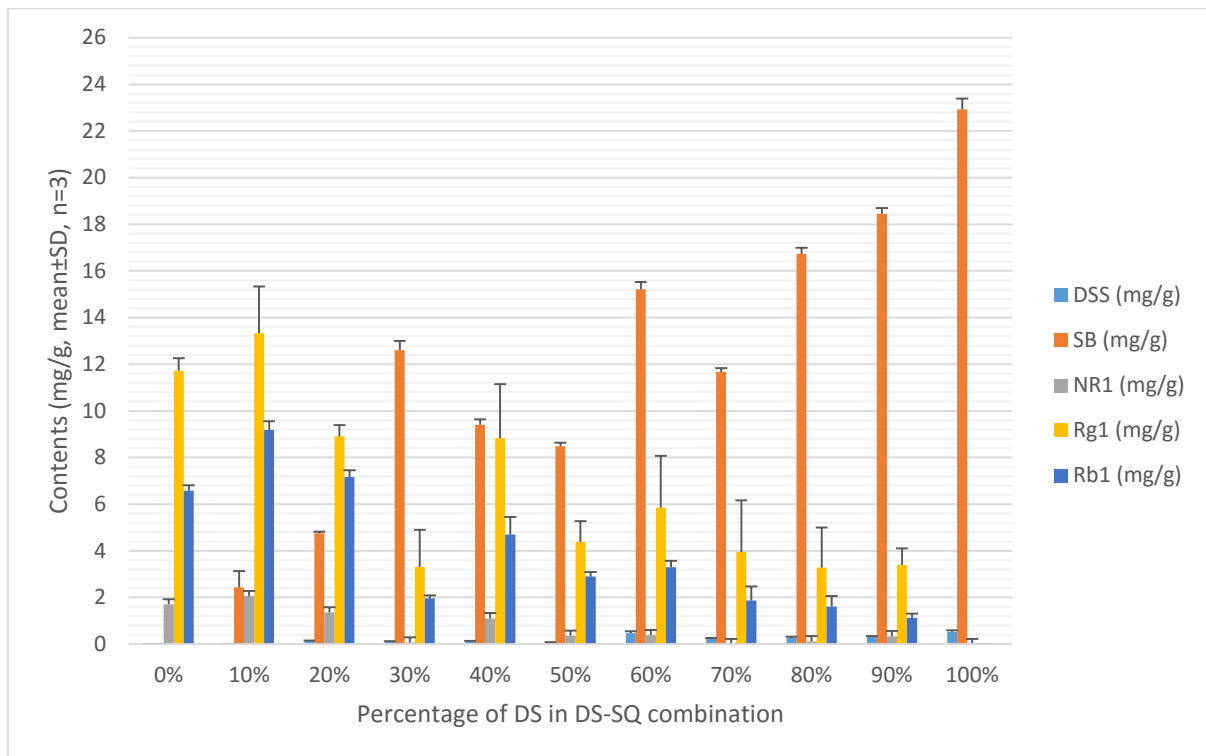

Supplement: MOESM2 [file 16497932]
